# Supplementary material for: Synthesis and structural elucidation of a novel bis-spirooxindole from isatin and ethylenediamine
Source: publisher site journal article supplement (doi:10.3762/bjoc.22.63), 2026-05-27
Supplement: Additional file 1 [file 1860-5397-22-63-S1.pdf]

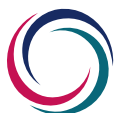

## Supporting Information

for

### **Synthesis and structural elucidation of a novel bis-spirooxindole from isatin and ethylenediamine**

Irene Moreno-Gutiérrez, Josefa L. López-Martínez, Sonia Berenguel-Gómez, Irene Torres-García, Duane Choquesillo-Lazarte, Manuel Muñoz-Dorado, Miriam Álvarez-Corral and Ignacio Rodríguez-García

*Beilstein J. Org. Chem.* **2026**, 22, 813–820. [doi:10.3762/bjoc.22.63](https://doi.org/10.3762/bjoc.22.63)

### **Copies of IR, NMR and MS spectra**

## Index

|                                                                                            |            |
|--------------------------------------------------------------------------------------------|------------|
| <b>Spectroscopic characterization of 25</b> .....                                          | <b>S2</b>  |
| Figure S1. <sup>1</sup> H NMR (600 MHz, CD <sub>3</sub> OD) of <b>25</b> .....             | S2         |
| Figure S2. <sup>13</sup> C NMR and DEPT (150 MHz, CD <sub>3</sub> OD) of <b>25</b> .....   | S3         |
| Figure S3. 2D NMR (COSY) (600 MHz, CD <sub>3</sub> OD) of <b>25</b> .....                  | S4         |
| Figure S4. 2D NMR (HMQC) (600 MHz, CD <sub>3</sub> OD) of <b>25</b> .....                  | S5         |
| Figure S5. 2D NMR (HMBC) (600 MHz, CD <sub>3</sub> OD) of <b>25</b> .....                  | S6         |
| Figure S6. HRMS Q-TOF of <b>25</b> .....                                                   | S7         |
| Figure S7. IR (ATR) of <b>25</b> .....                                                     | S8         |
| <b>Spectroscopic characterization of 24</b> .....                                          | <b>S9</b>  |
| Figure S8. <sup>1</sup> H NMR (600 MHz, DMSO-d <sub>6</sub> ) of <b>24</b> .....           | S9         |
| Figure S9. <sup>13</sup> C NMR and DEPT (151 MHz, DMSO-d <sub>6</sub> ) of <b>24</b> ..... | S10        |
| Figure S10. IR (ATR) of <b>24</b> .....                                                    | S11        |
| <b>Spectroscopic characterization of 30</b> .....                                          | <b>S12</b> |
| Figure S11. <sup>1</sup> H NMR (300 MHz, CD <sub>3</sub> OD) of <b>30</b> .....            | S12        |
| Figure S12. <sup>13</sup> C NMR and DEPT (75 MHz, CD <sub>3</sub> OD) of <b>30</b> .....   | S13        |
| Figure S13. 2D NMR (COSY) (300 MHz, CD <sub>3</sub> OD) of <b>30</b> .....                 | S14        |
| Figure S14. 2D NMR (HMQC) (300 MHz, CD <sub>3</sub> OD) of <b>30</b> .....                 | S15        |
| Figure S15. 2D NMR (HMBC) (600 MHz, CD <sub>3</sub> OD) of <b>30</b> .....                 | S16        |

### Spectroscopic characterization of 25

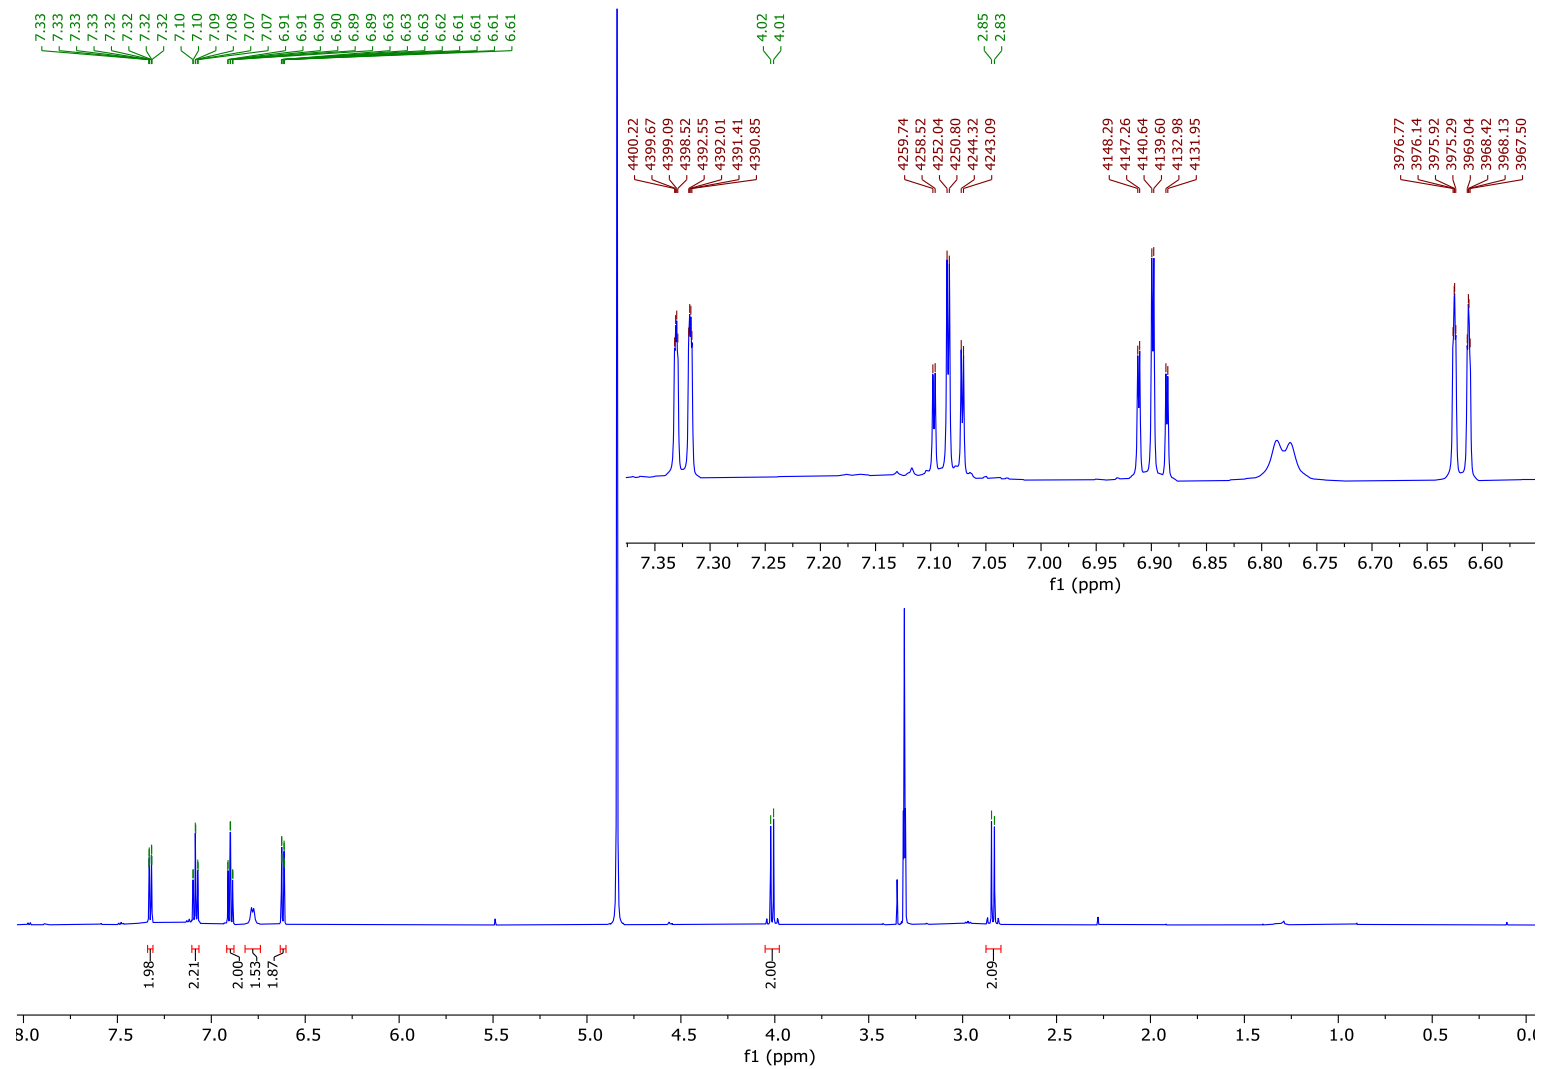

Figure S1. <sup>1</sup>H NMR (600 MHz, CD<sub>3</sub>OD) of 25.

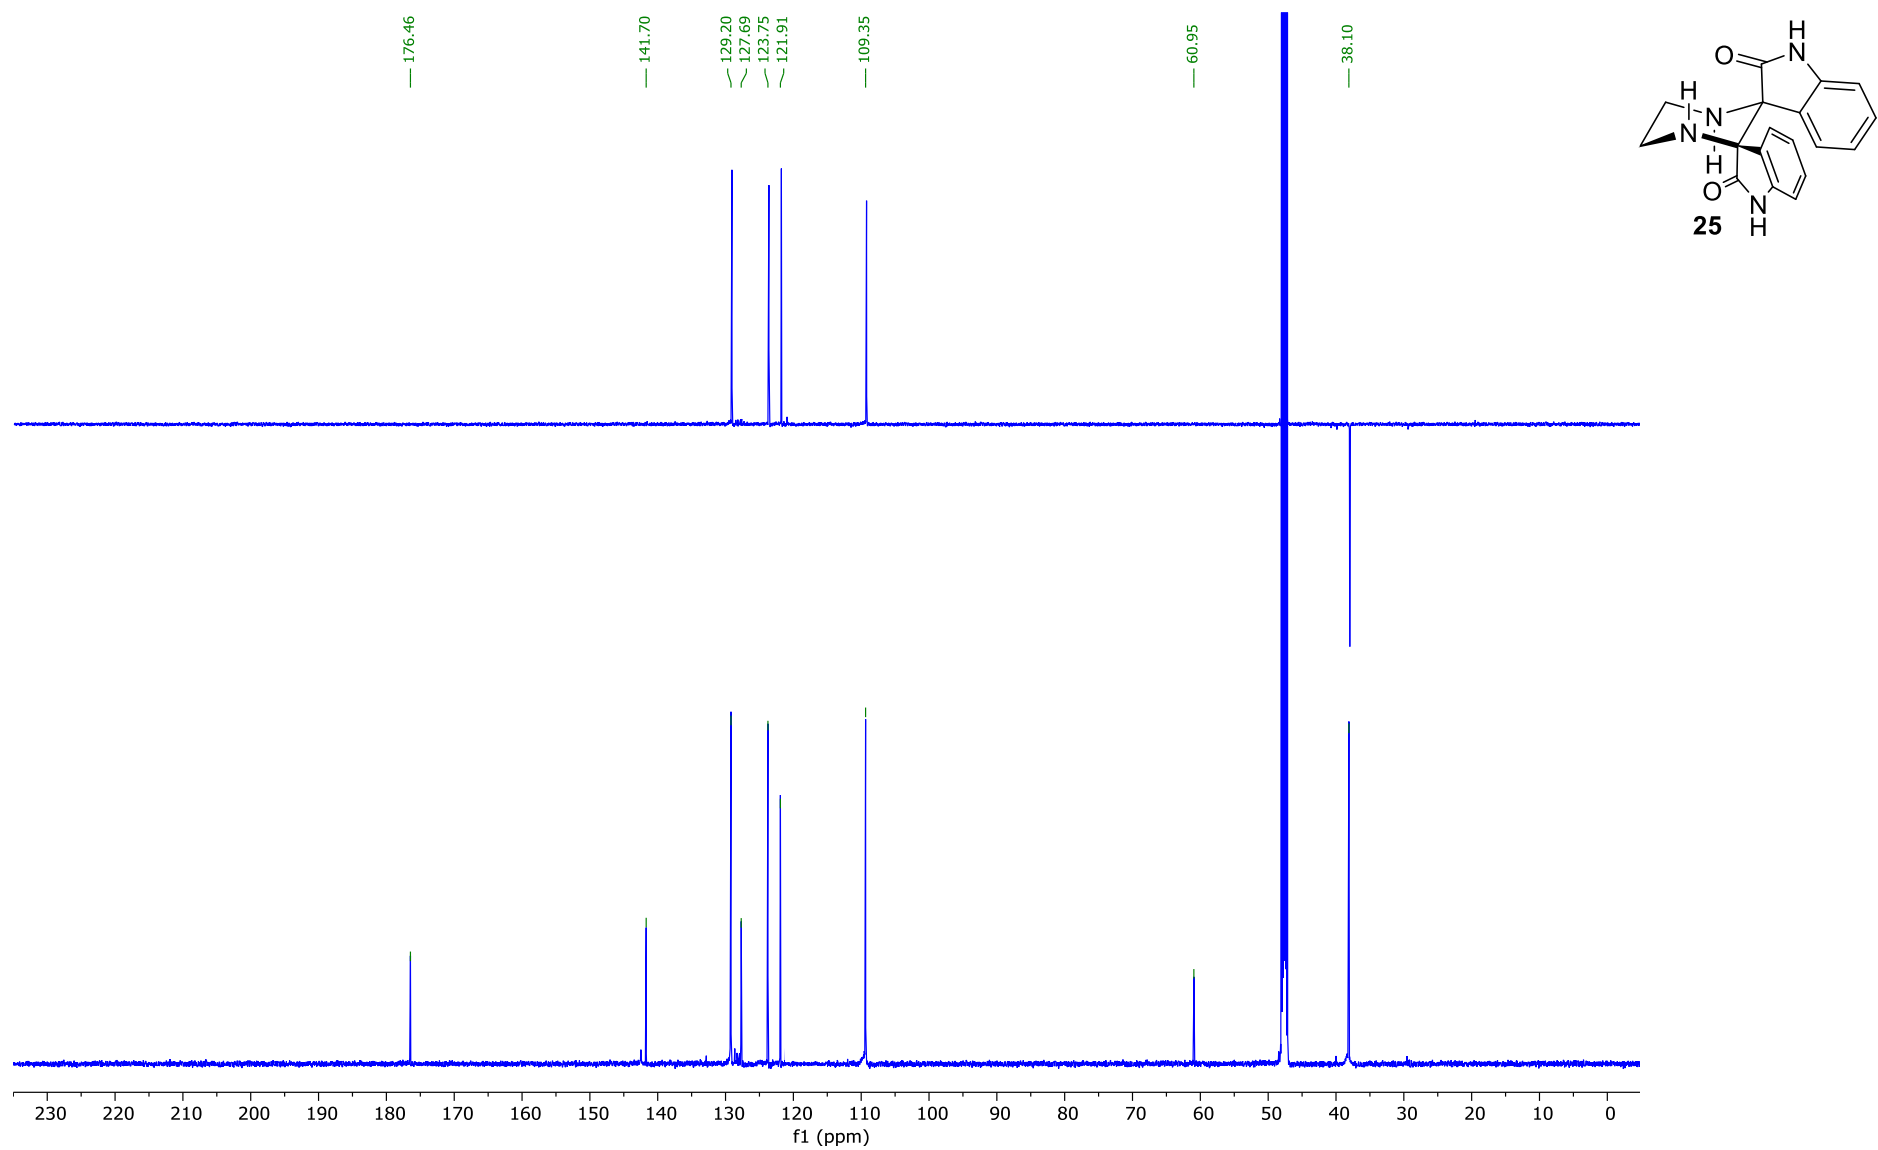

**Figure S2.**  $^{13}\text{C}$  NMR and DEPT (150 MHz,  $\text{CD}_3\text{OD}$ ) of **25**.

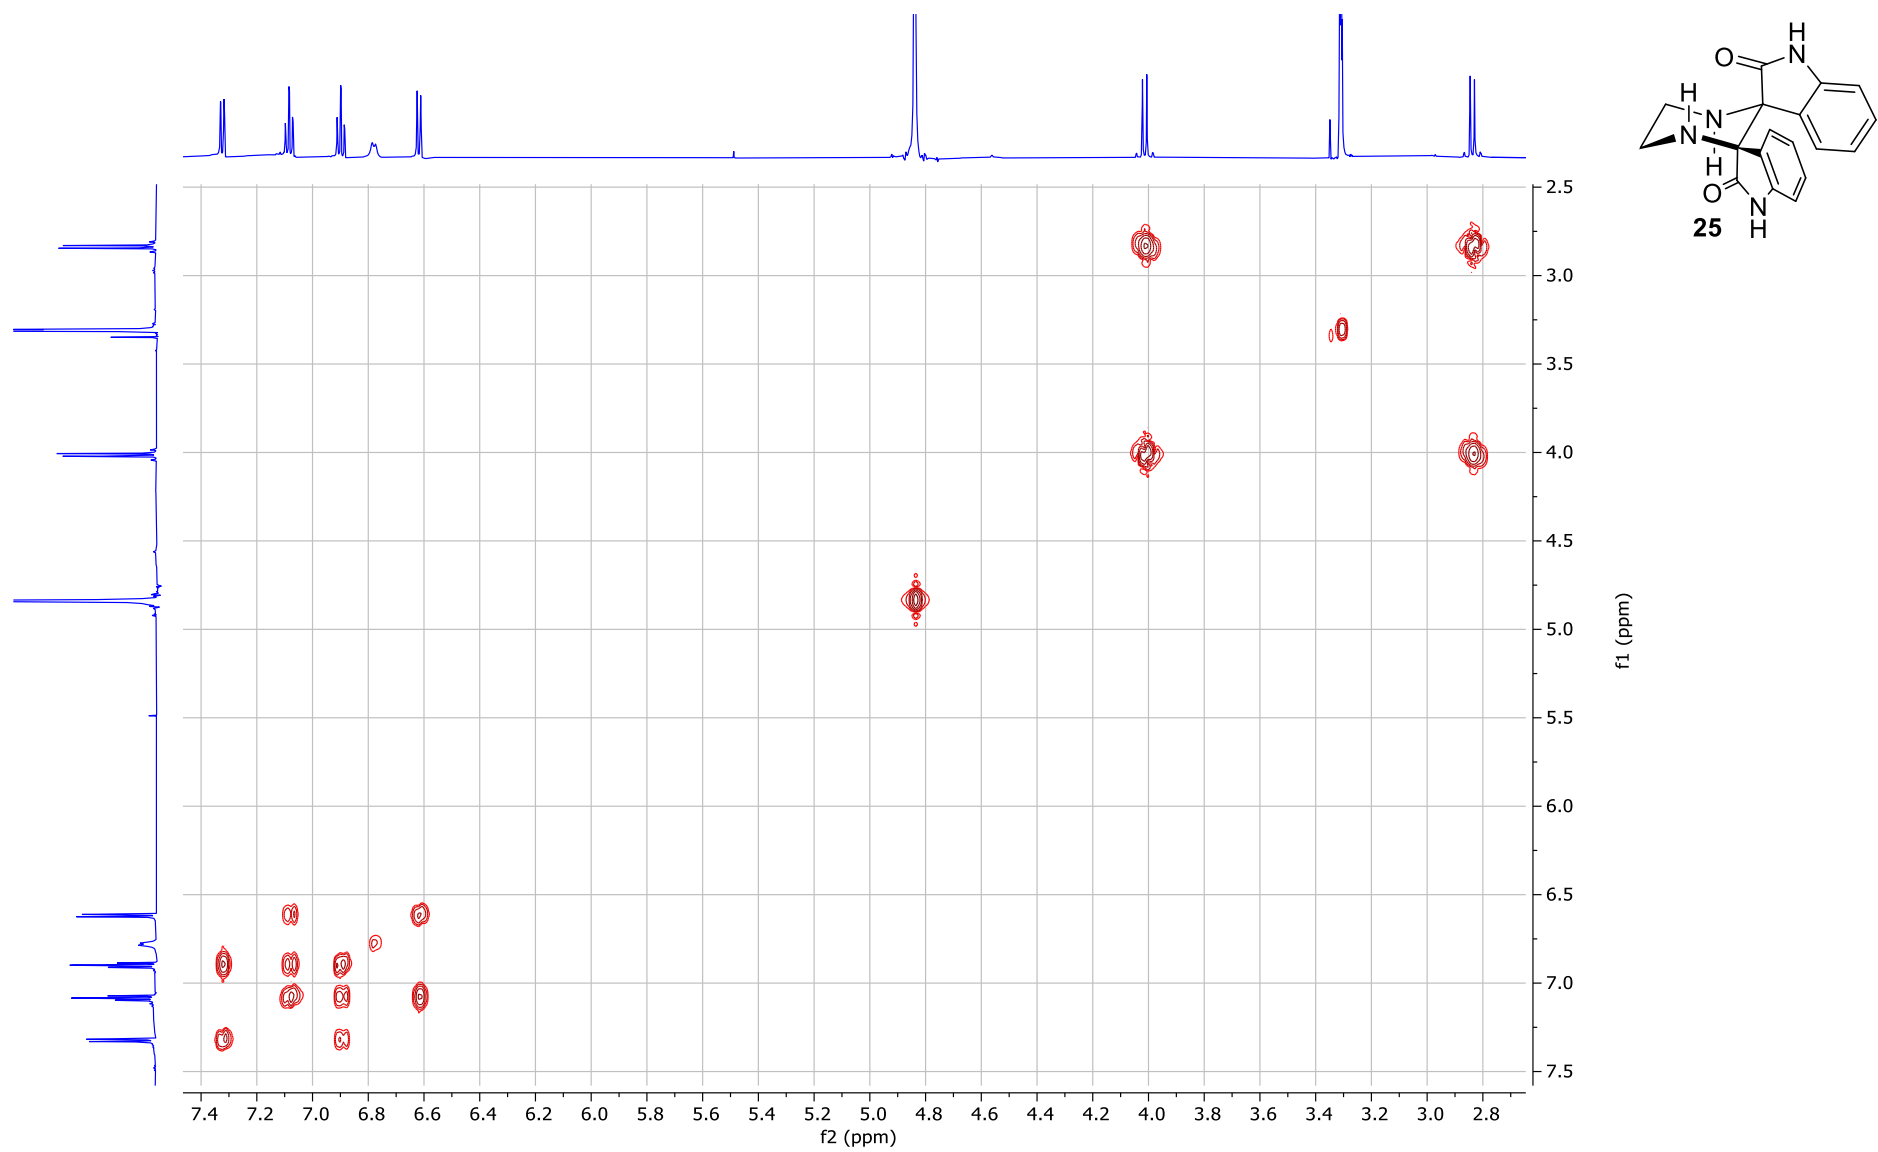

Figure S3. 2D NMR (COSY) (600 MHz, CD<sub>3</sub>OD) of 25.

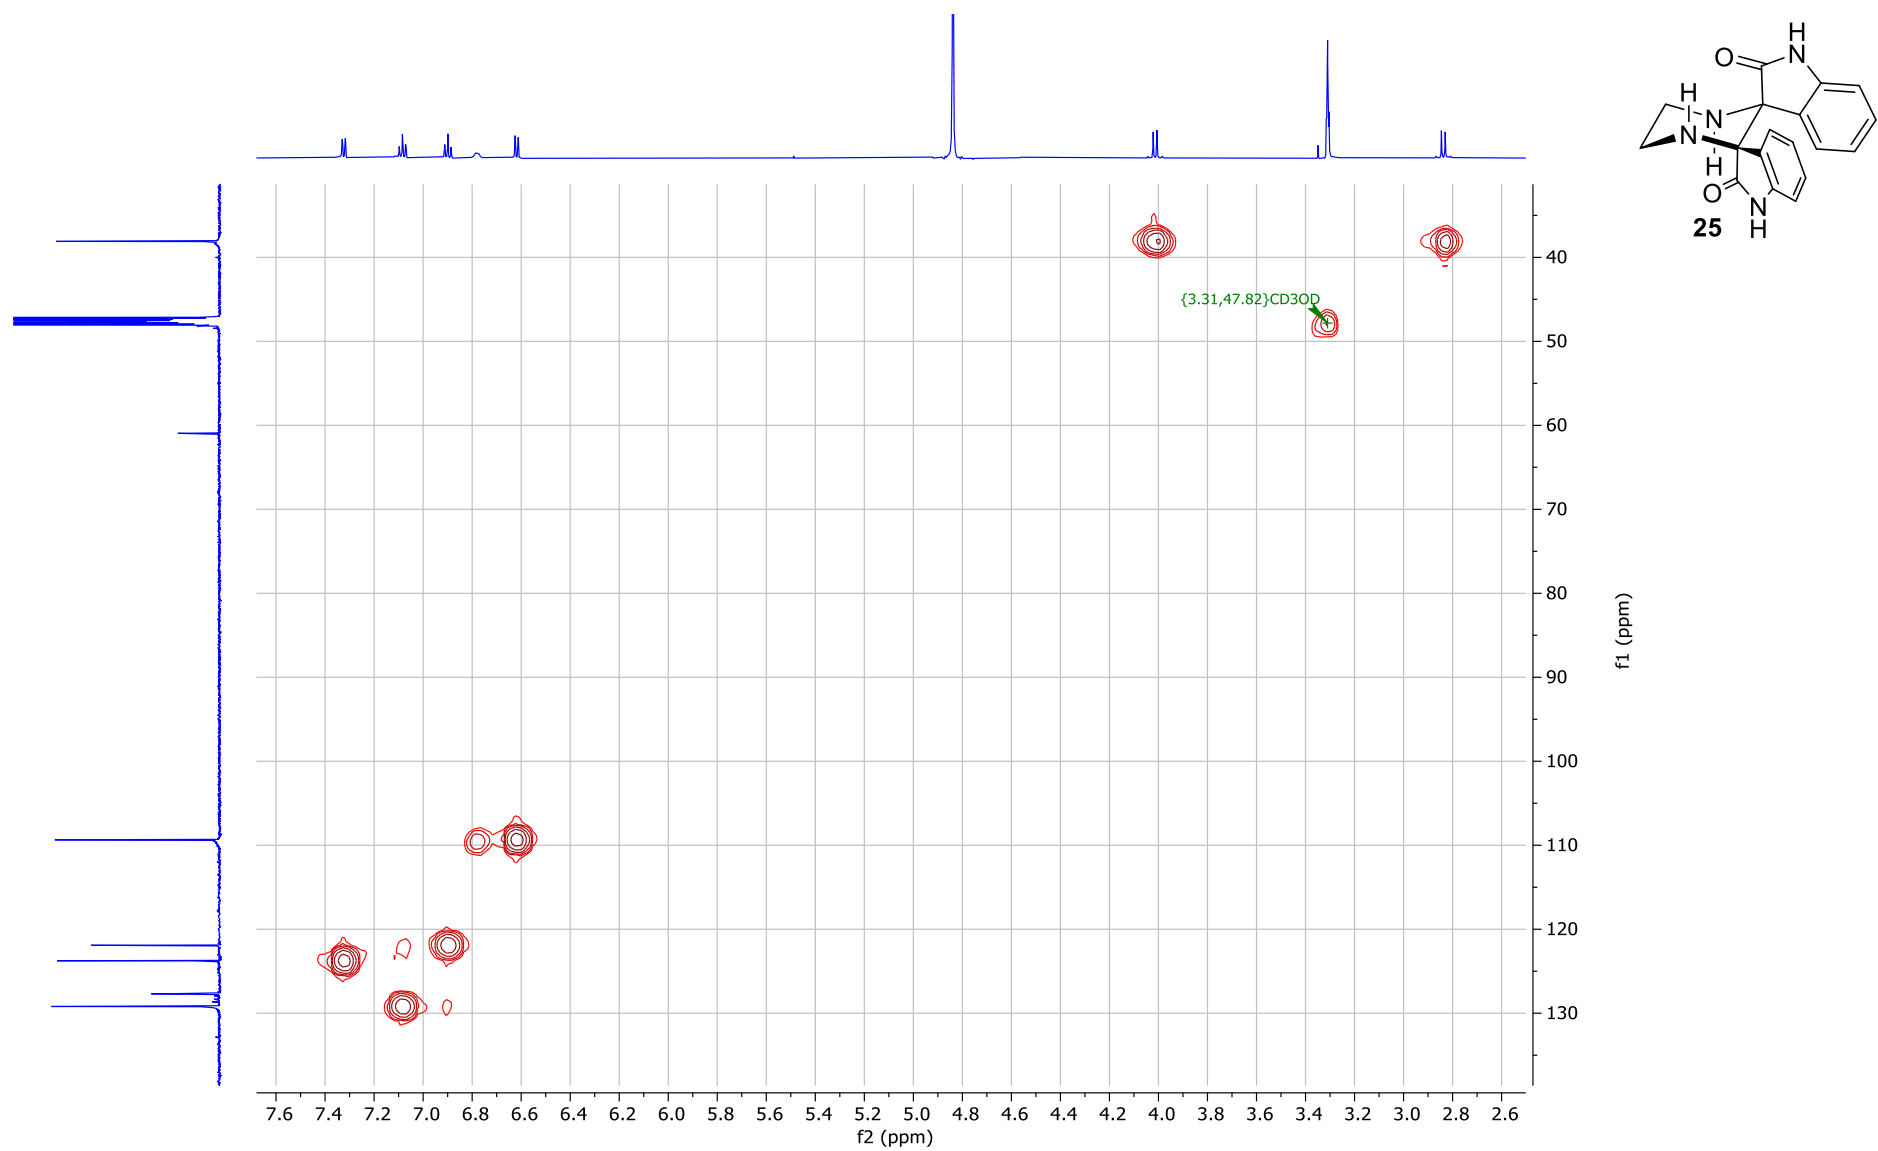

**Figure S4.** 2D NMR (HMQC) (600 MHz, CD<sub>3</sub>OD) of **25**.

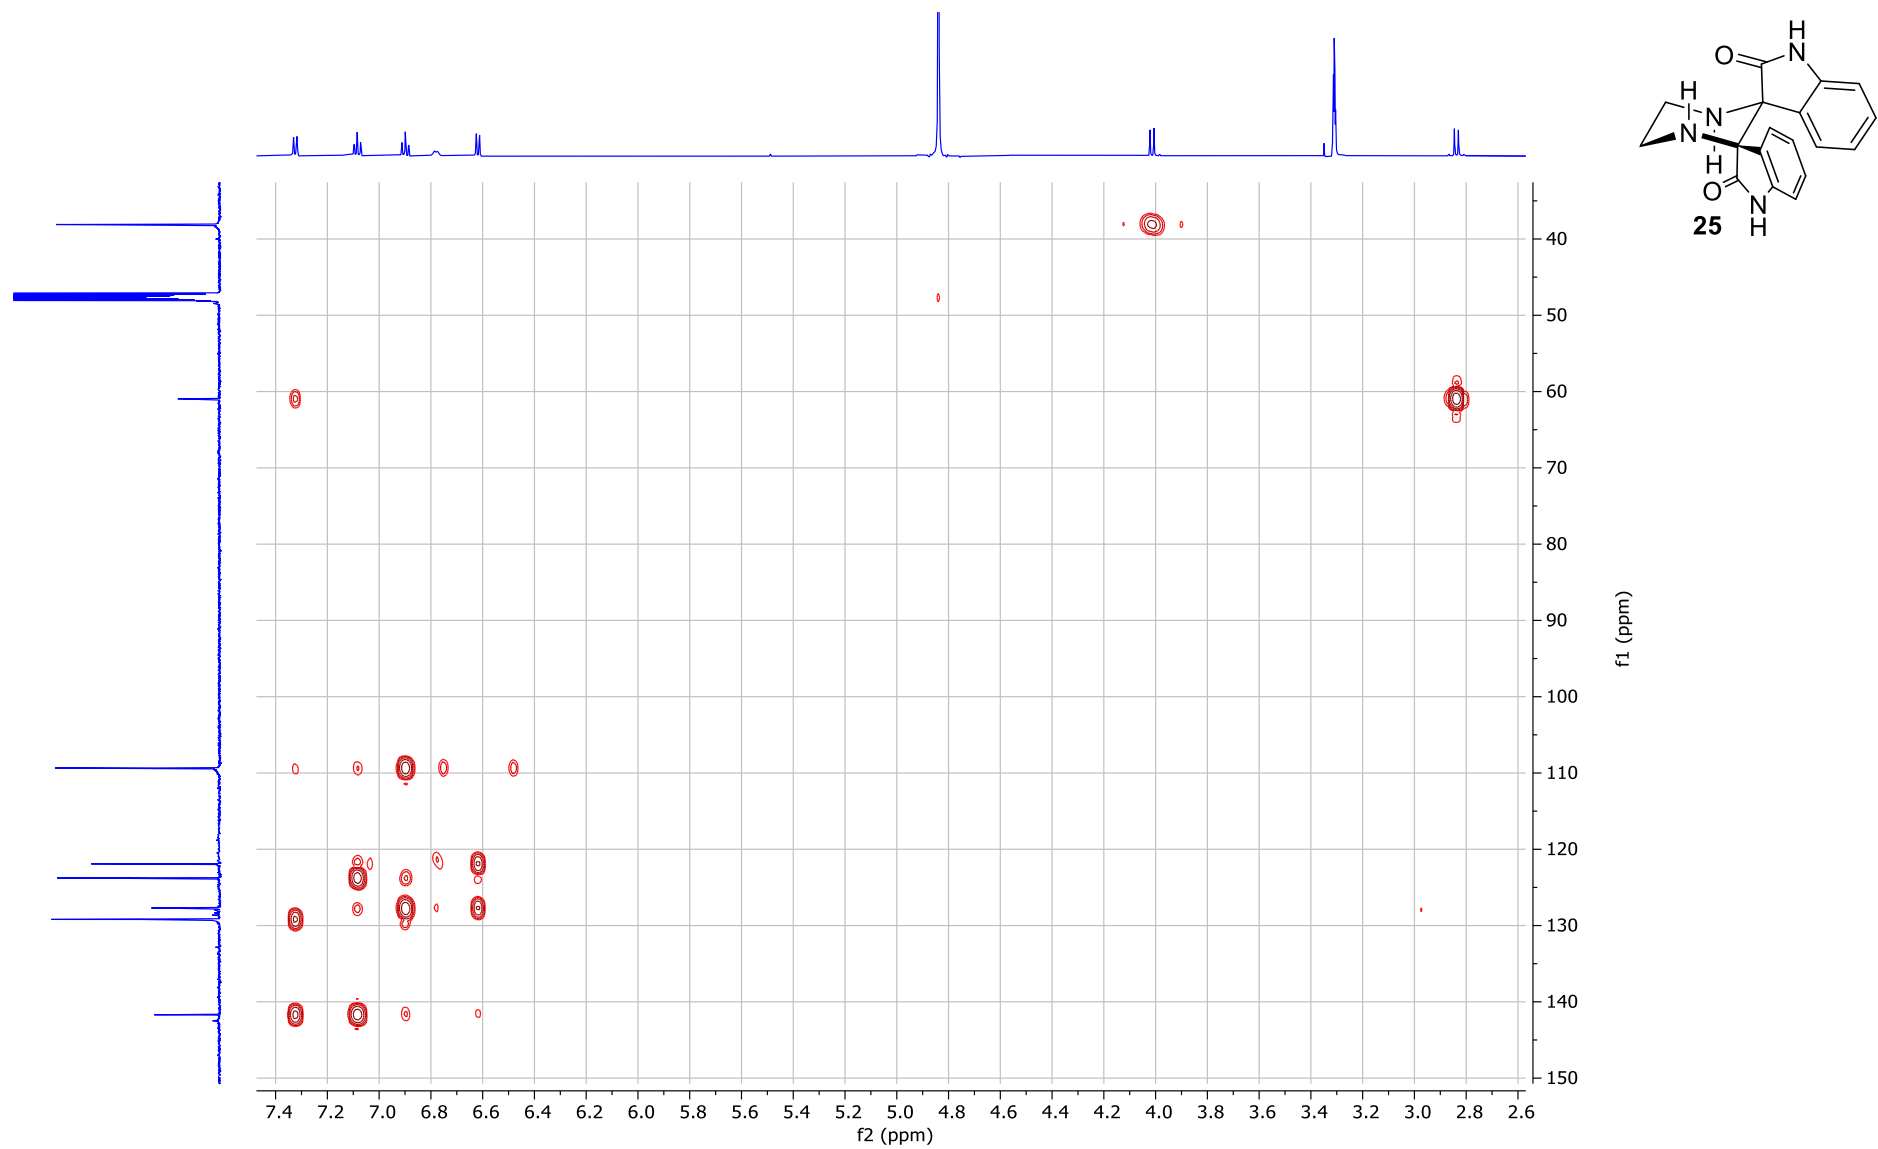

Figure S5. 2D NMR (HMBC) (600 MHz, CD<sub>3</sub>OD) of 25.

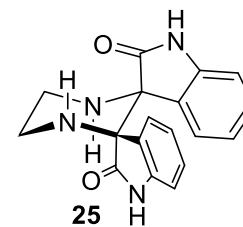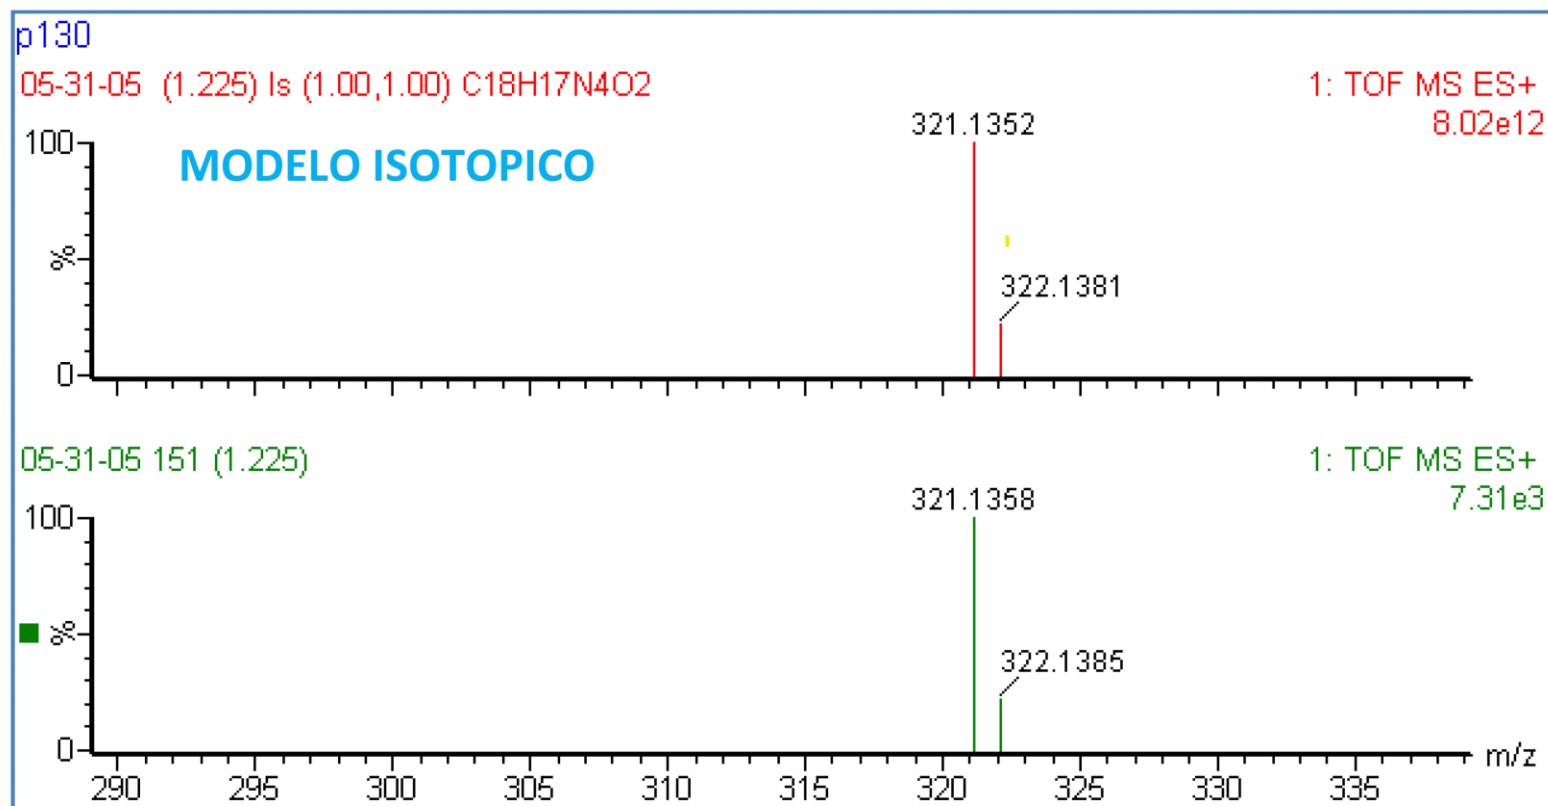

Figure S6. HRMS Q-TOF of 25.

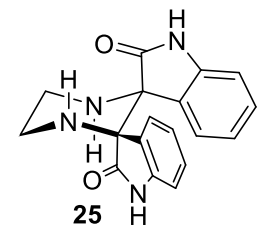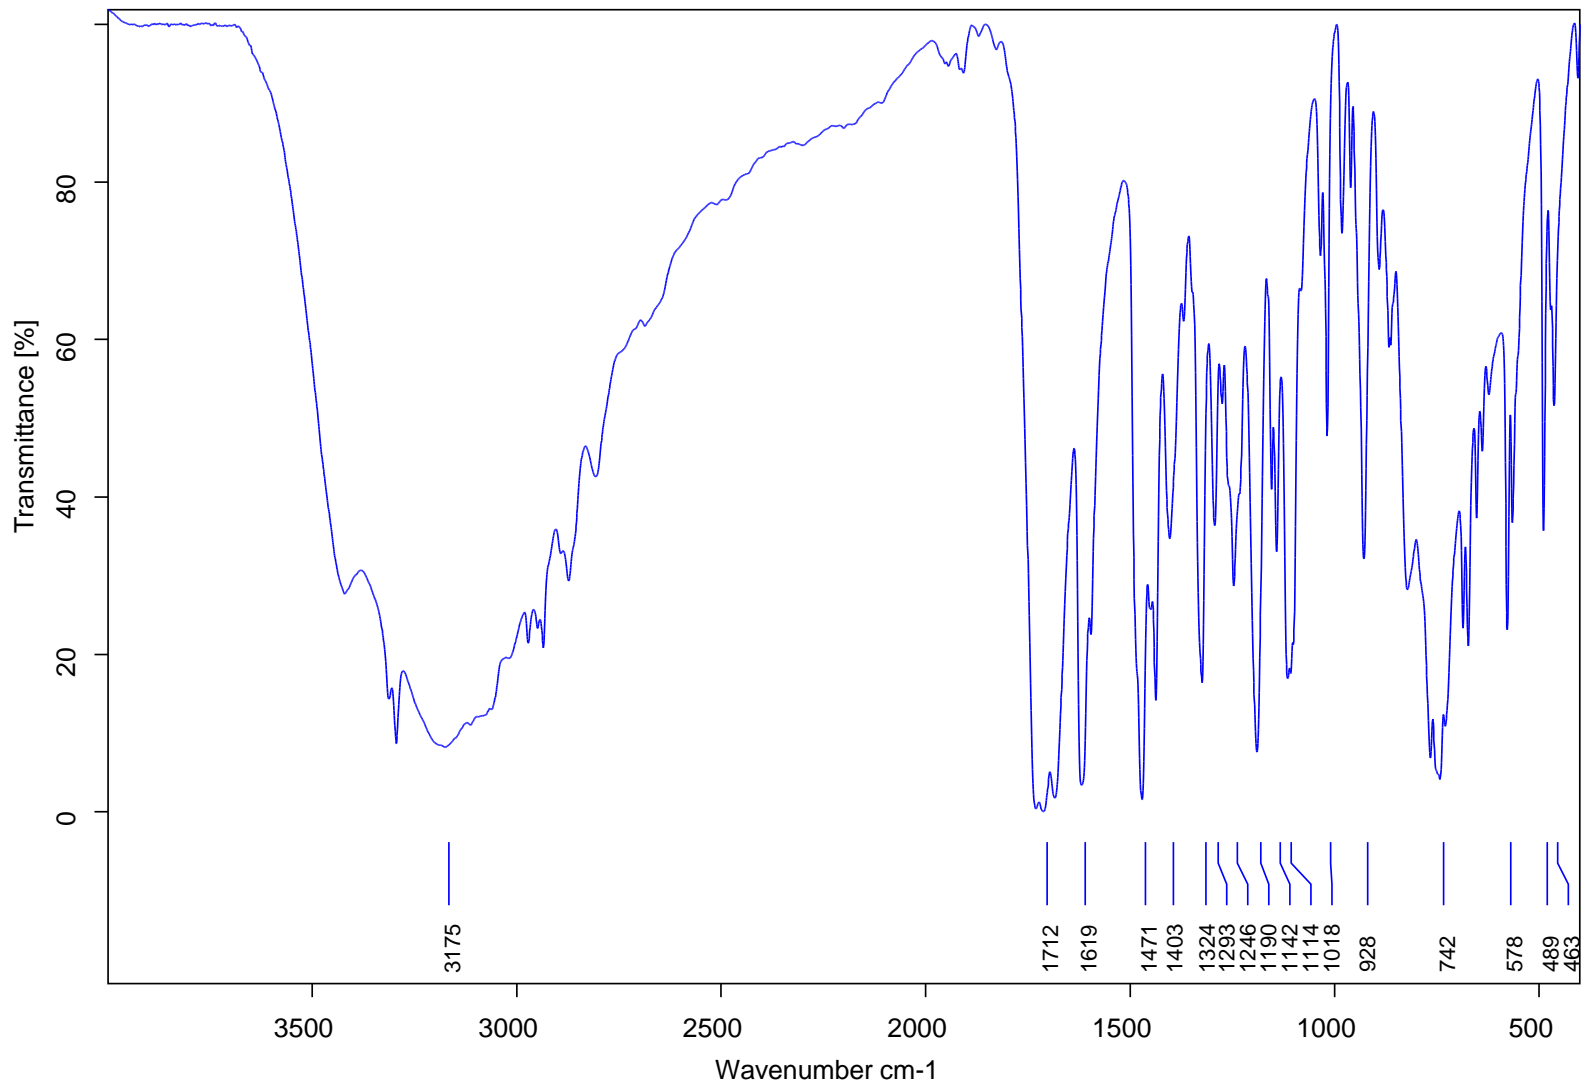

**Figure S7.** IR (ATR) of **25**.

### Spectroscopic characterization of 24

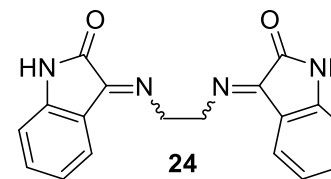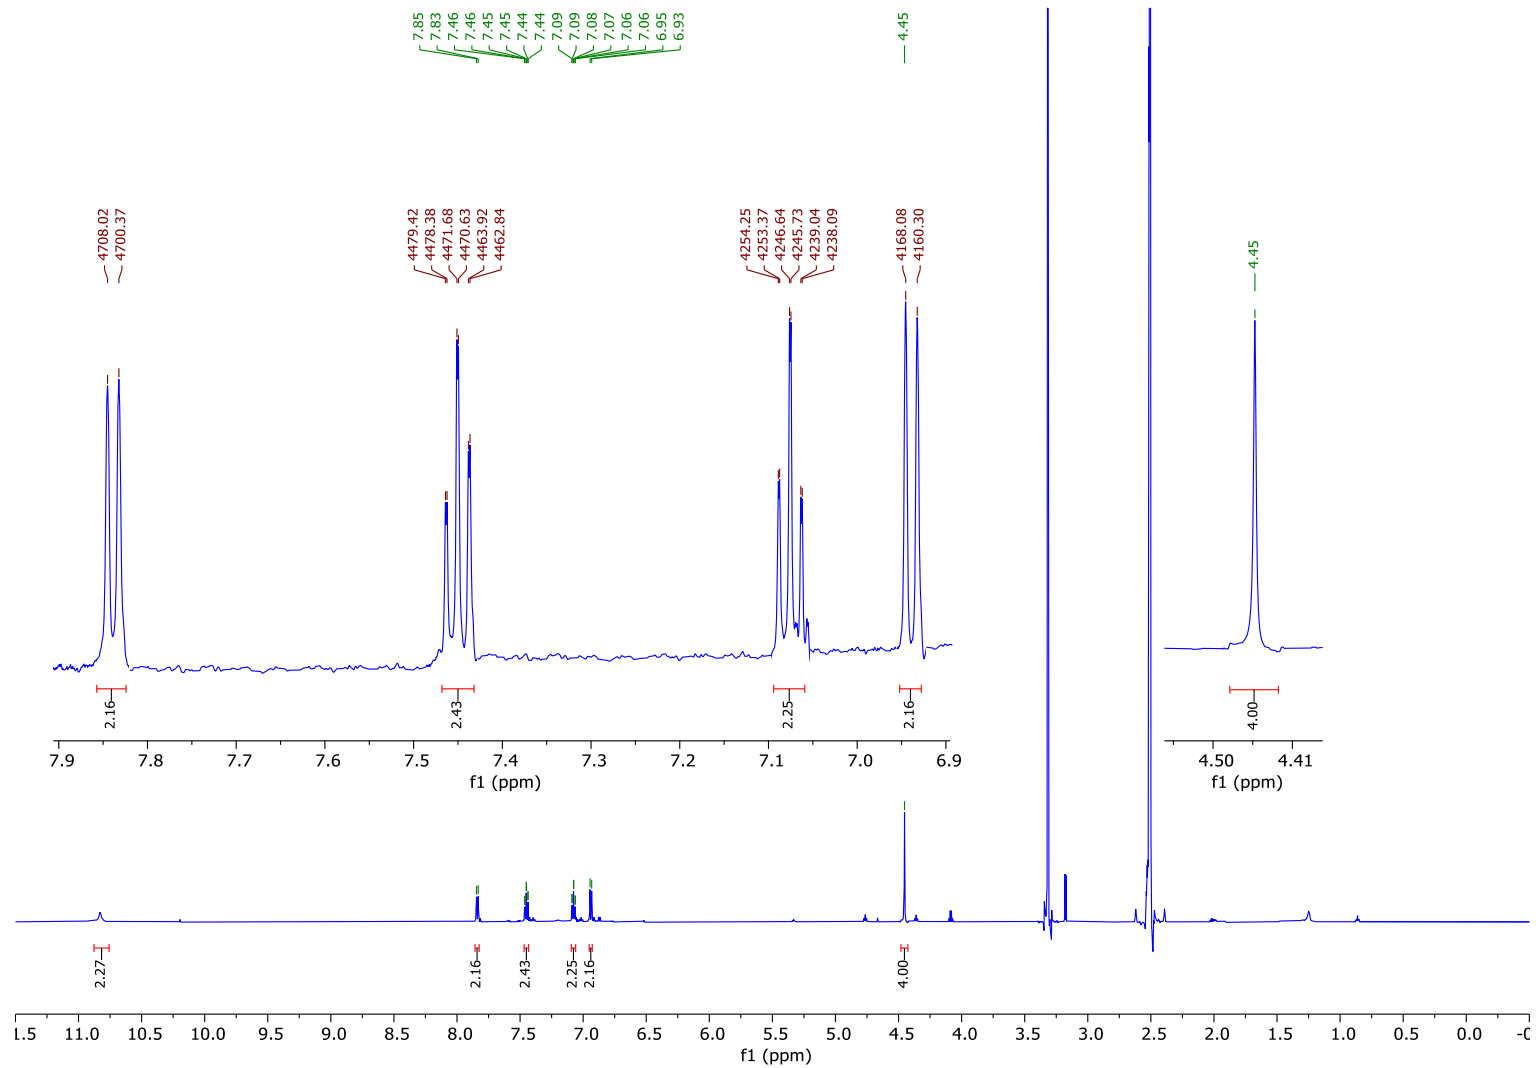

**Figure S8.** <sup>1</sup>H NMR (600 MHz, DMSO-d<sub>6</sub>) of **24**.

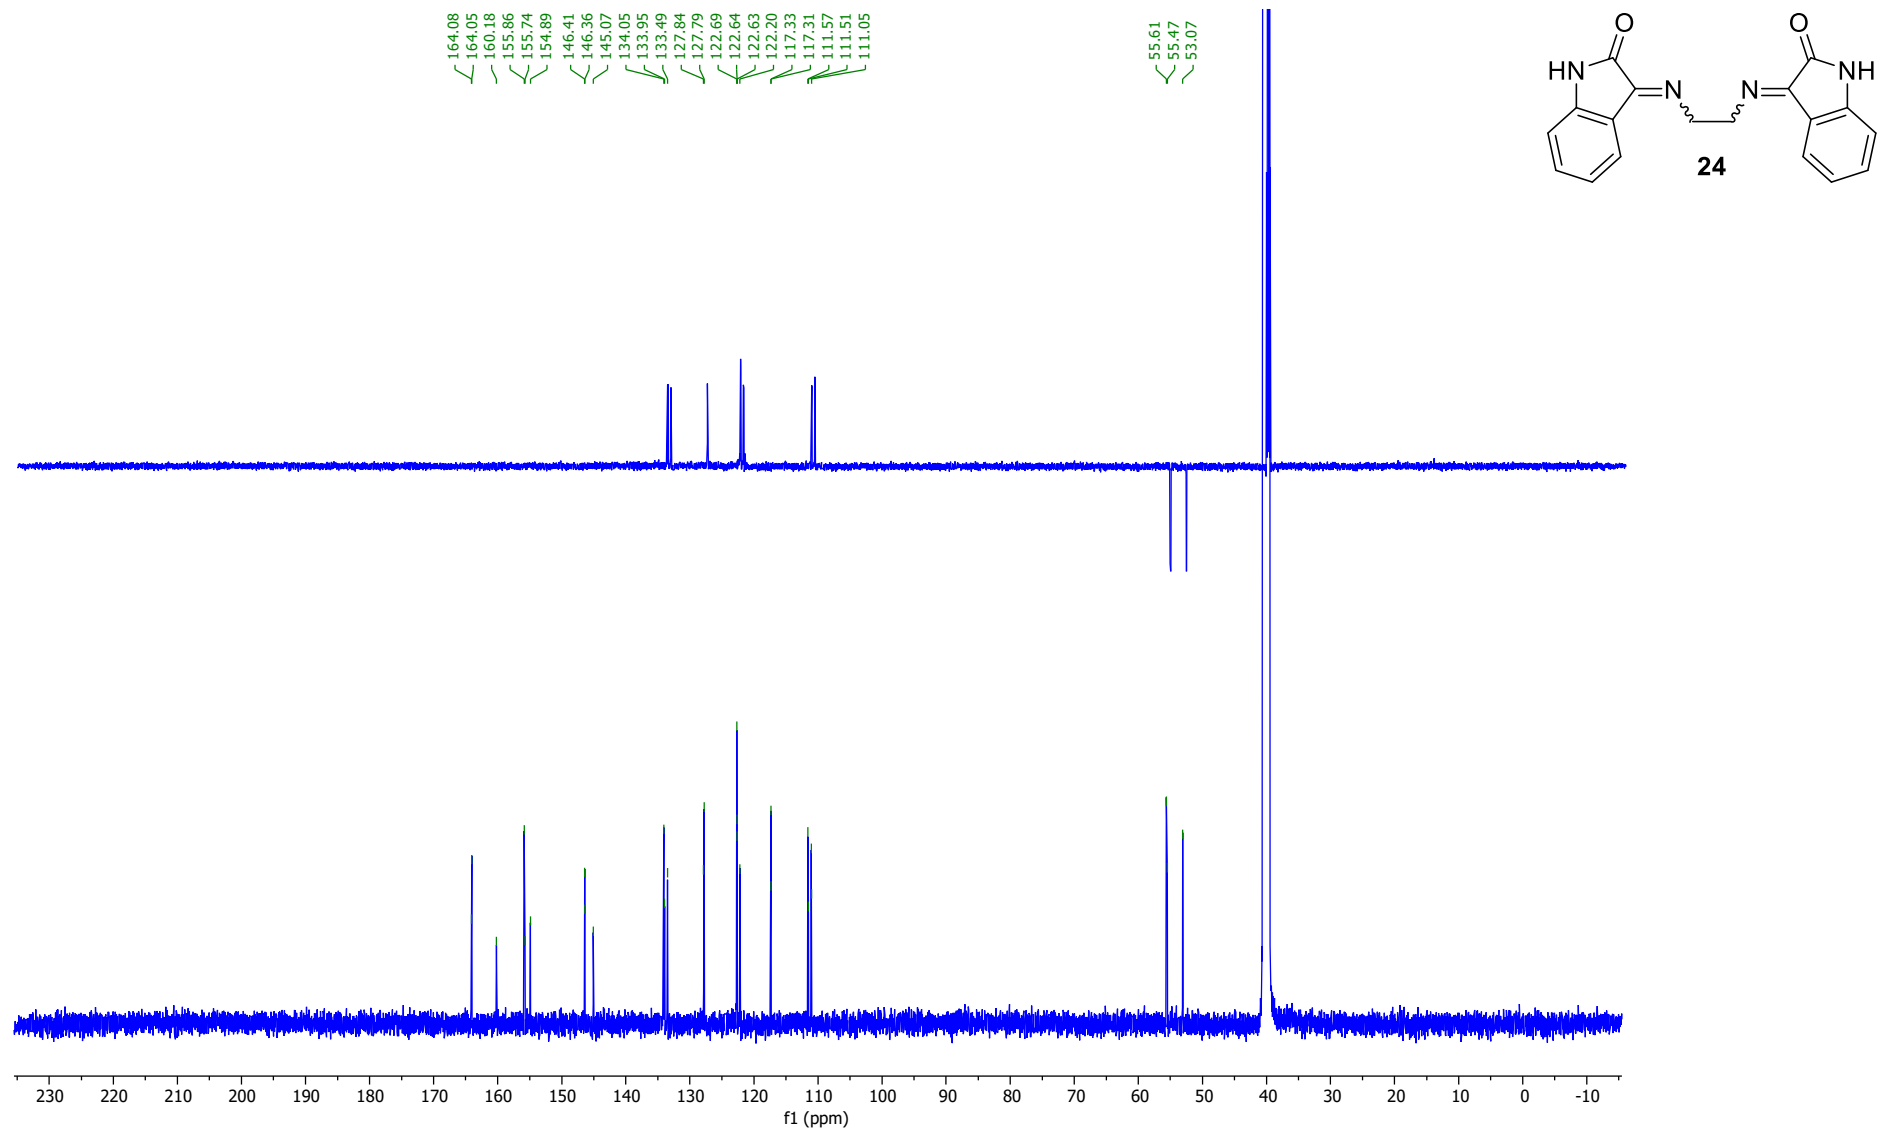

**Figure S9.**  $^{13}\text{C}$  NMR and DEPT (151 MHz,  $\text{DMSO-d}_6$ ) of **24**.

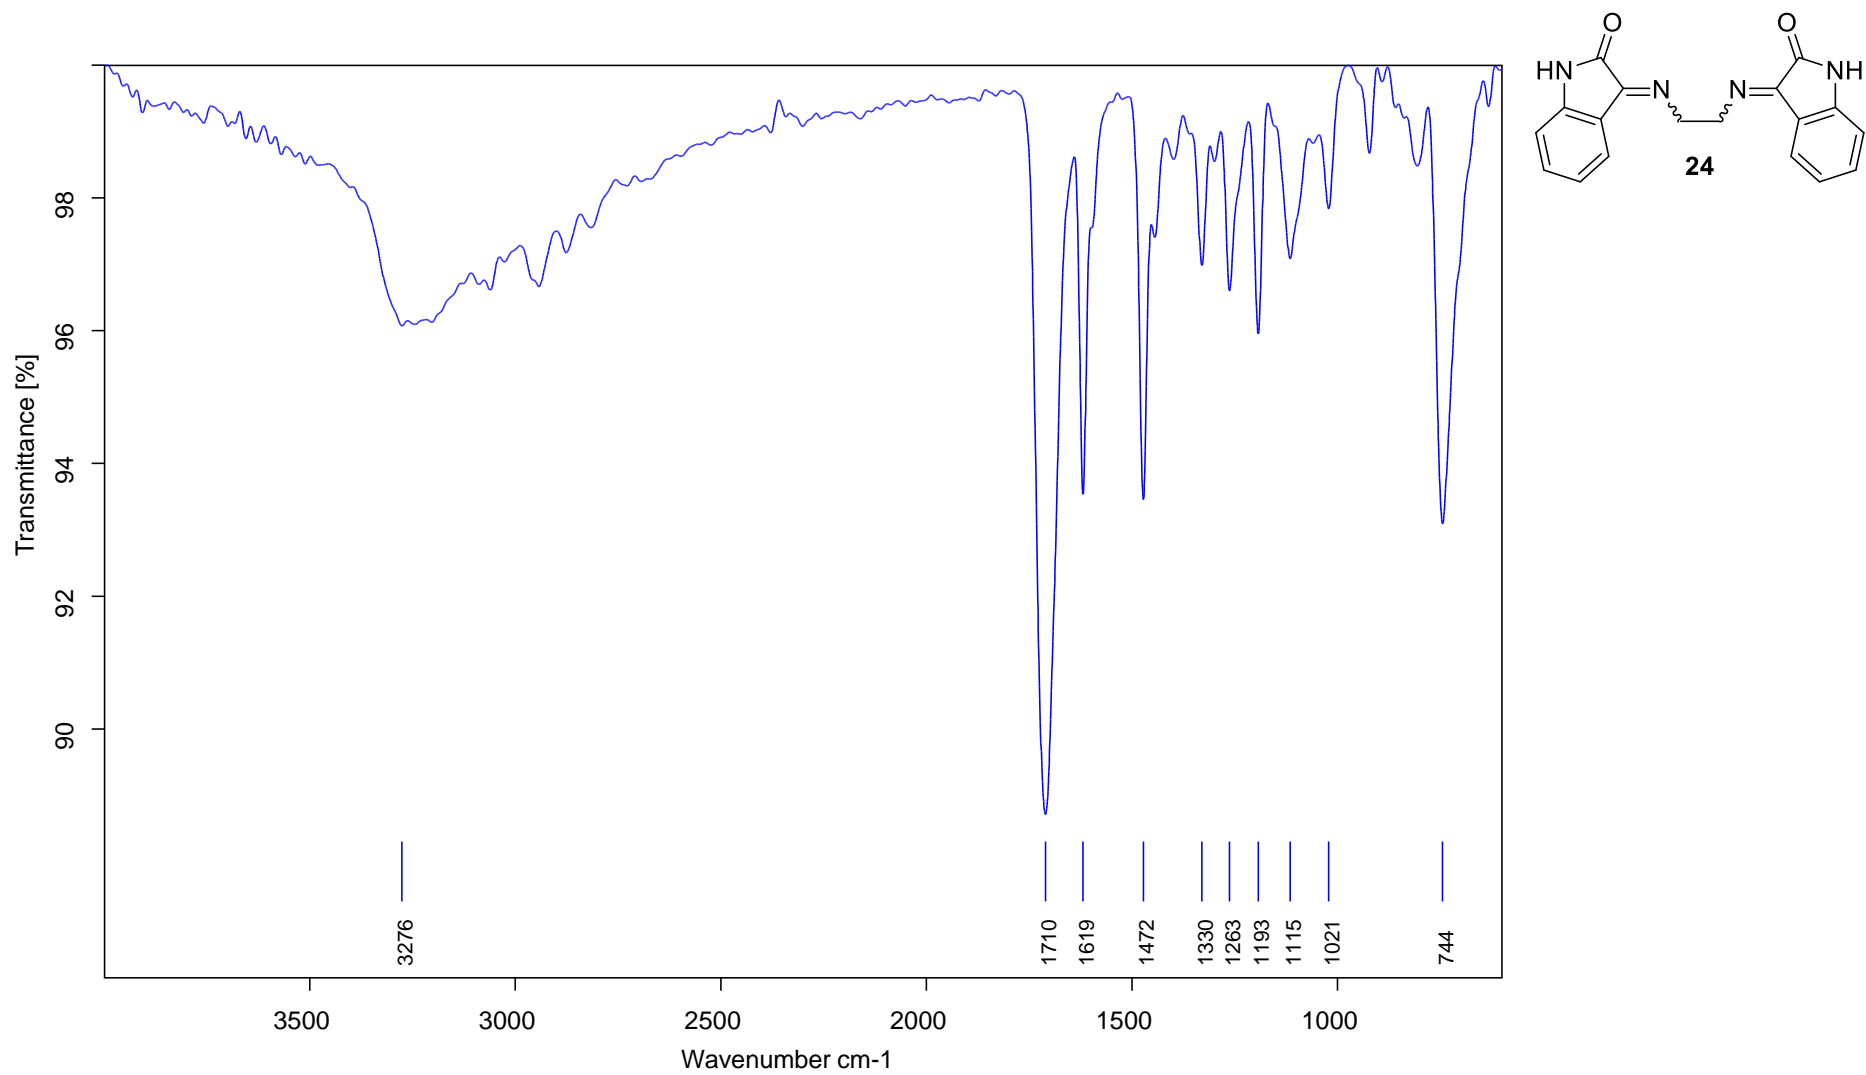

**Figure S10.** IR (ATR) of **24**.

### Spectroscopic characterization of 30

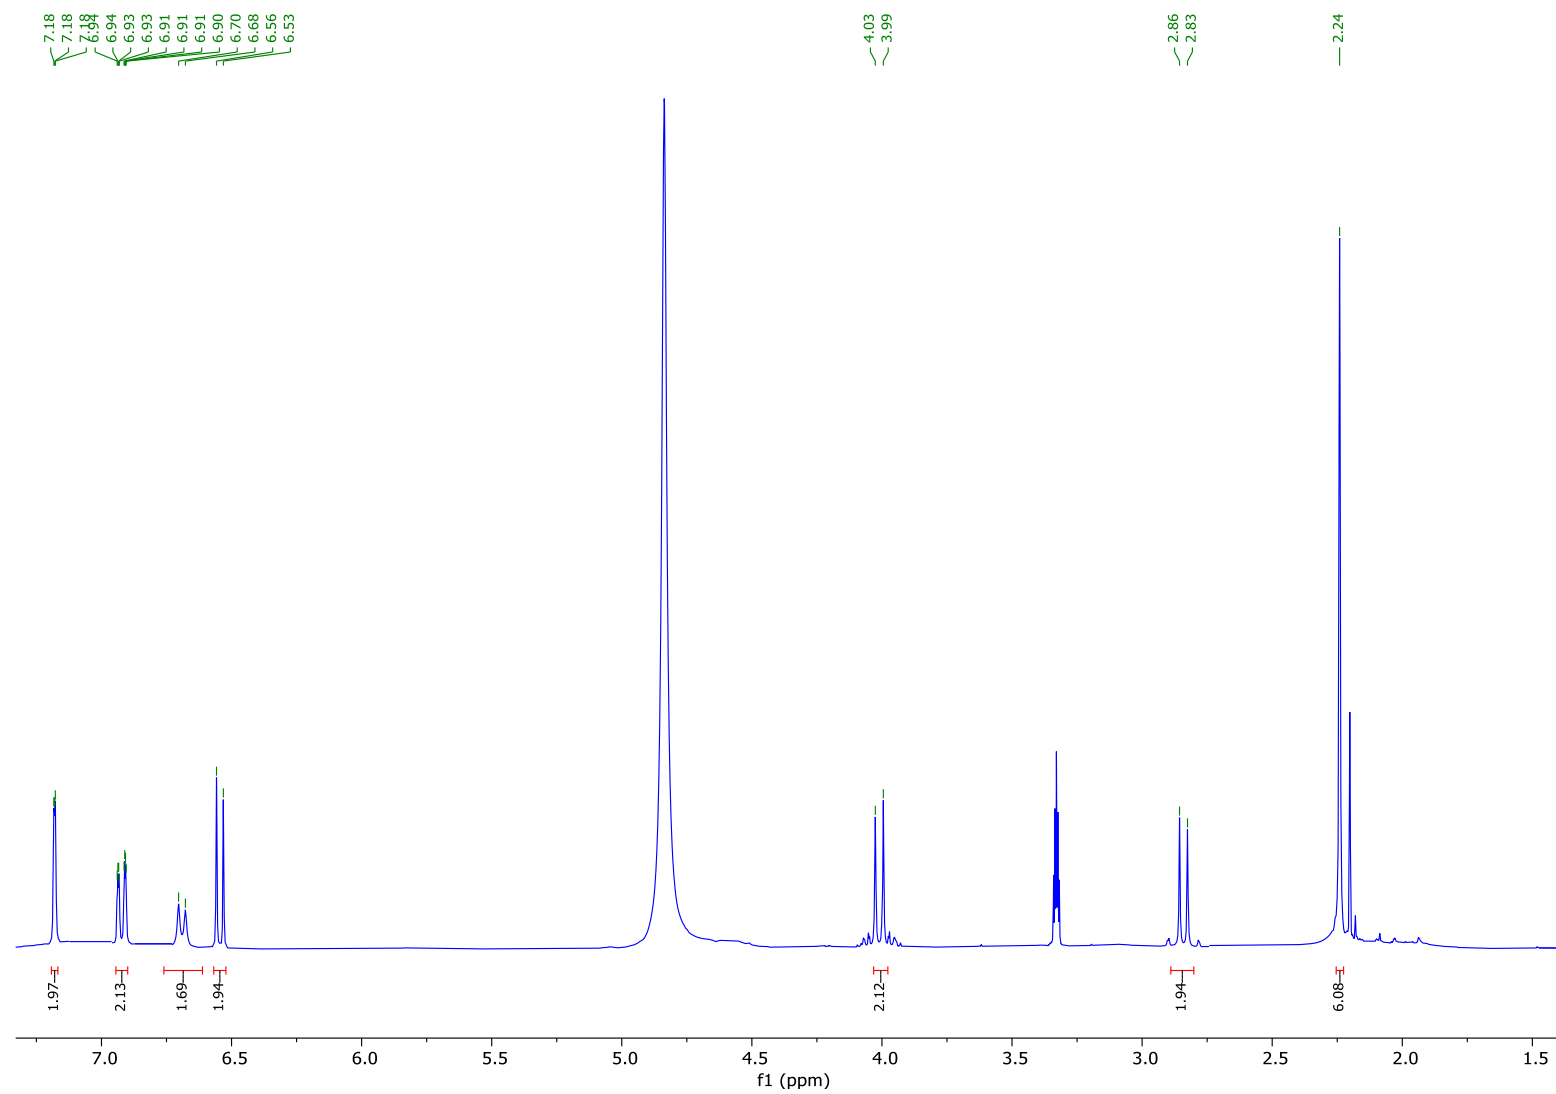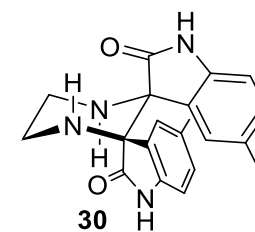

Figure S11. <sup>1</sup>H NMR (300 MHz, CD<sub>3</sub>OD) of 30.

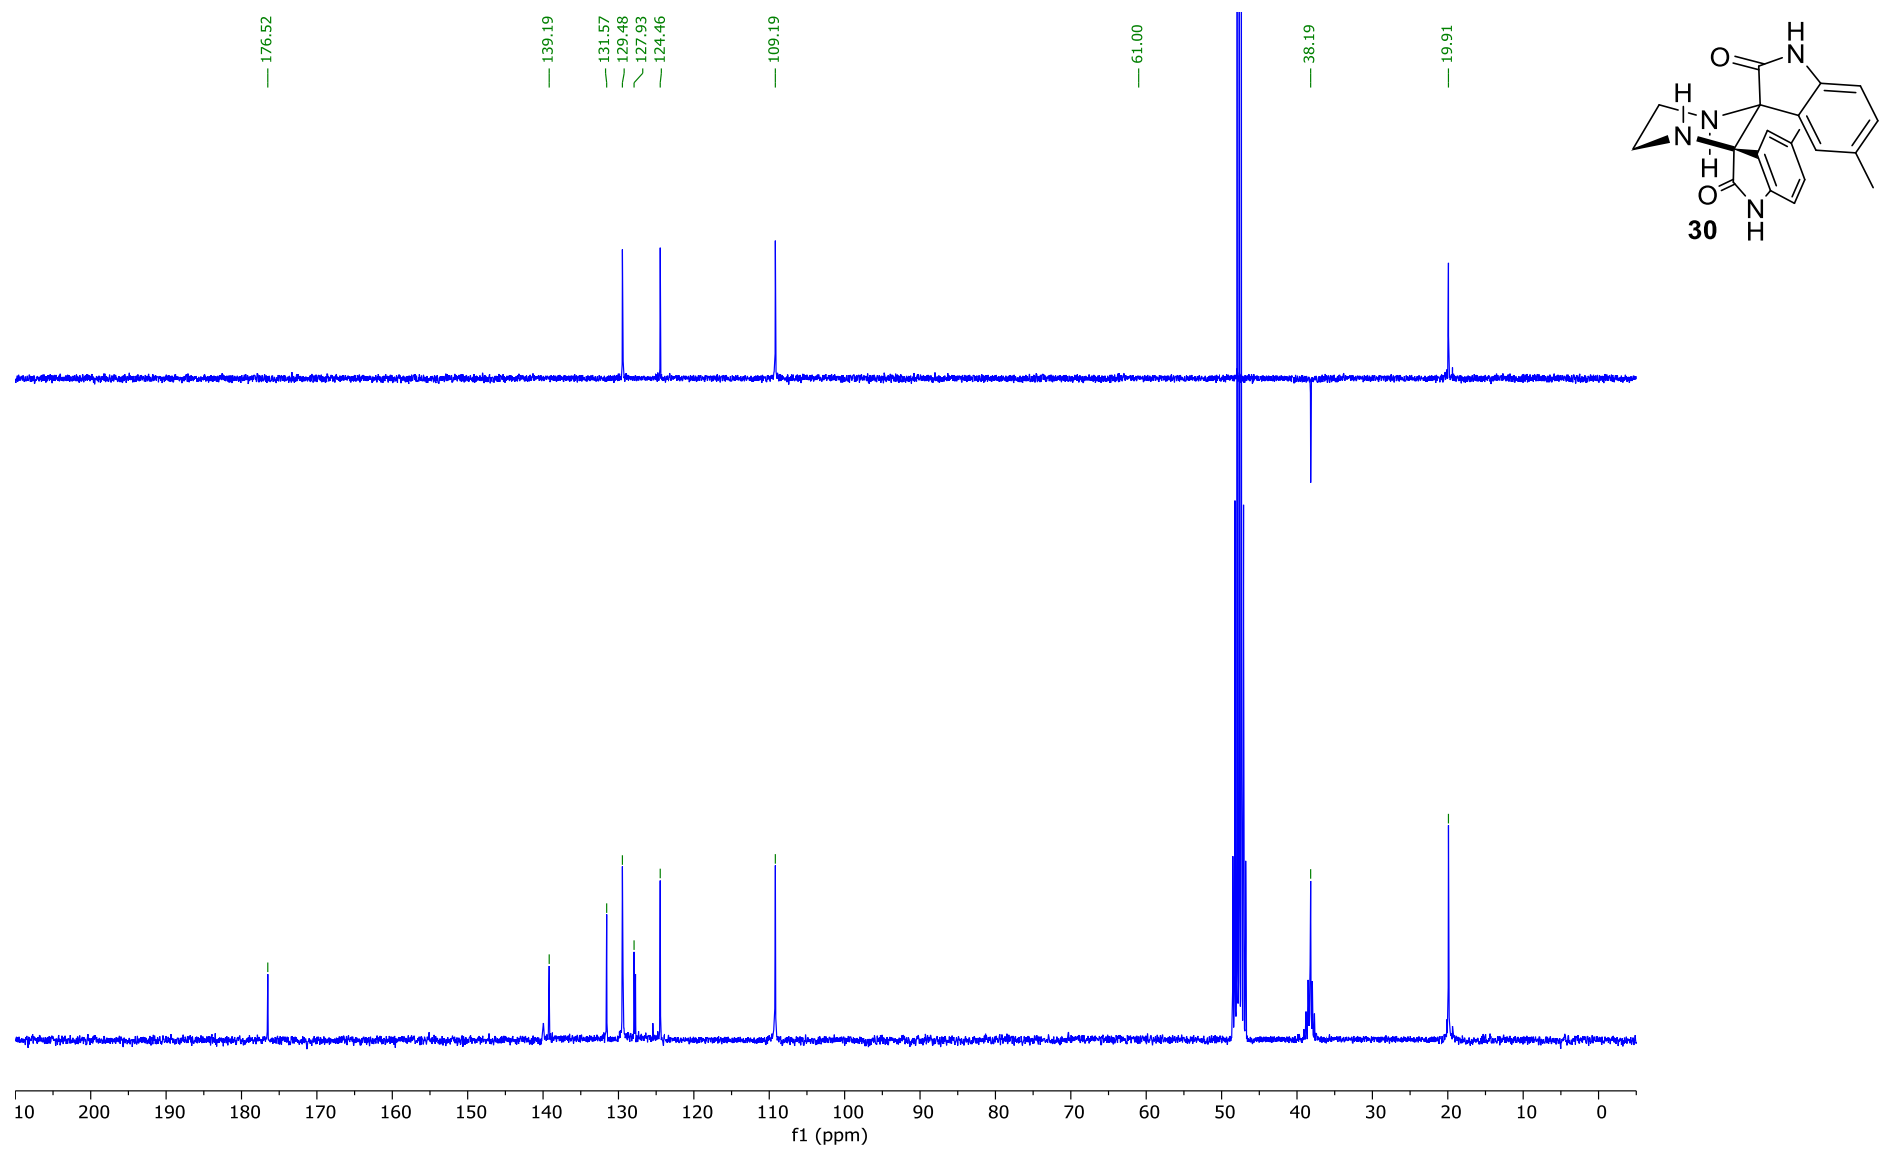

**Figure S12.**  $^{13}\text{C}$  NMR and DEPT (75 MHz,  $\text{CD}_3\text{OD}$ ) of **30**.

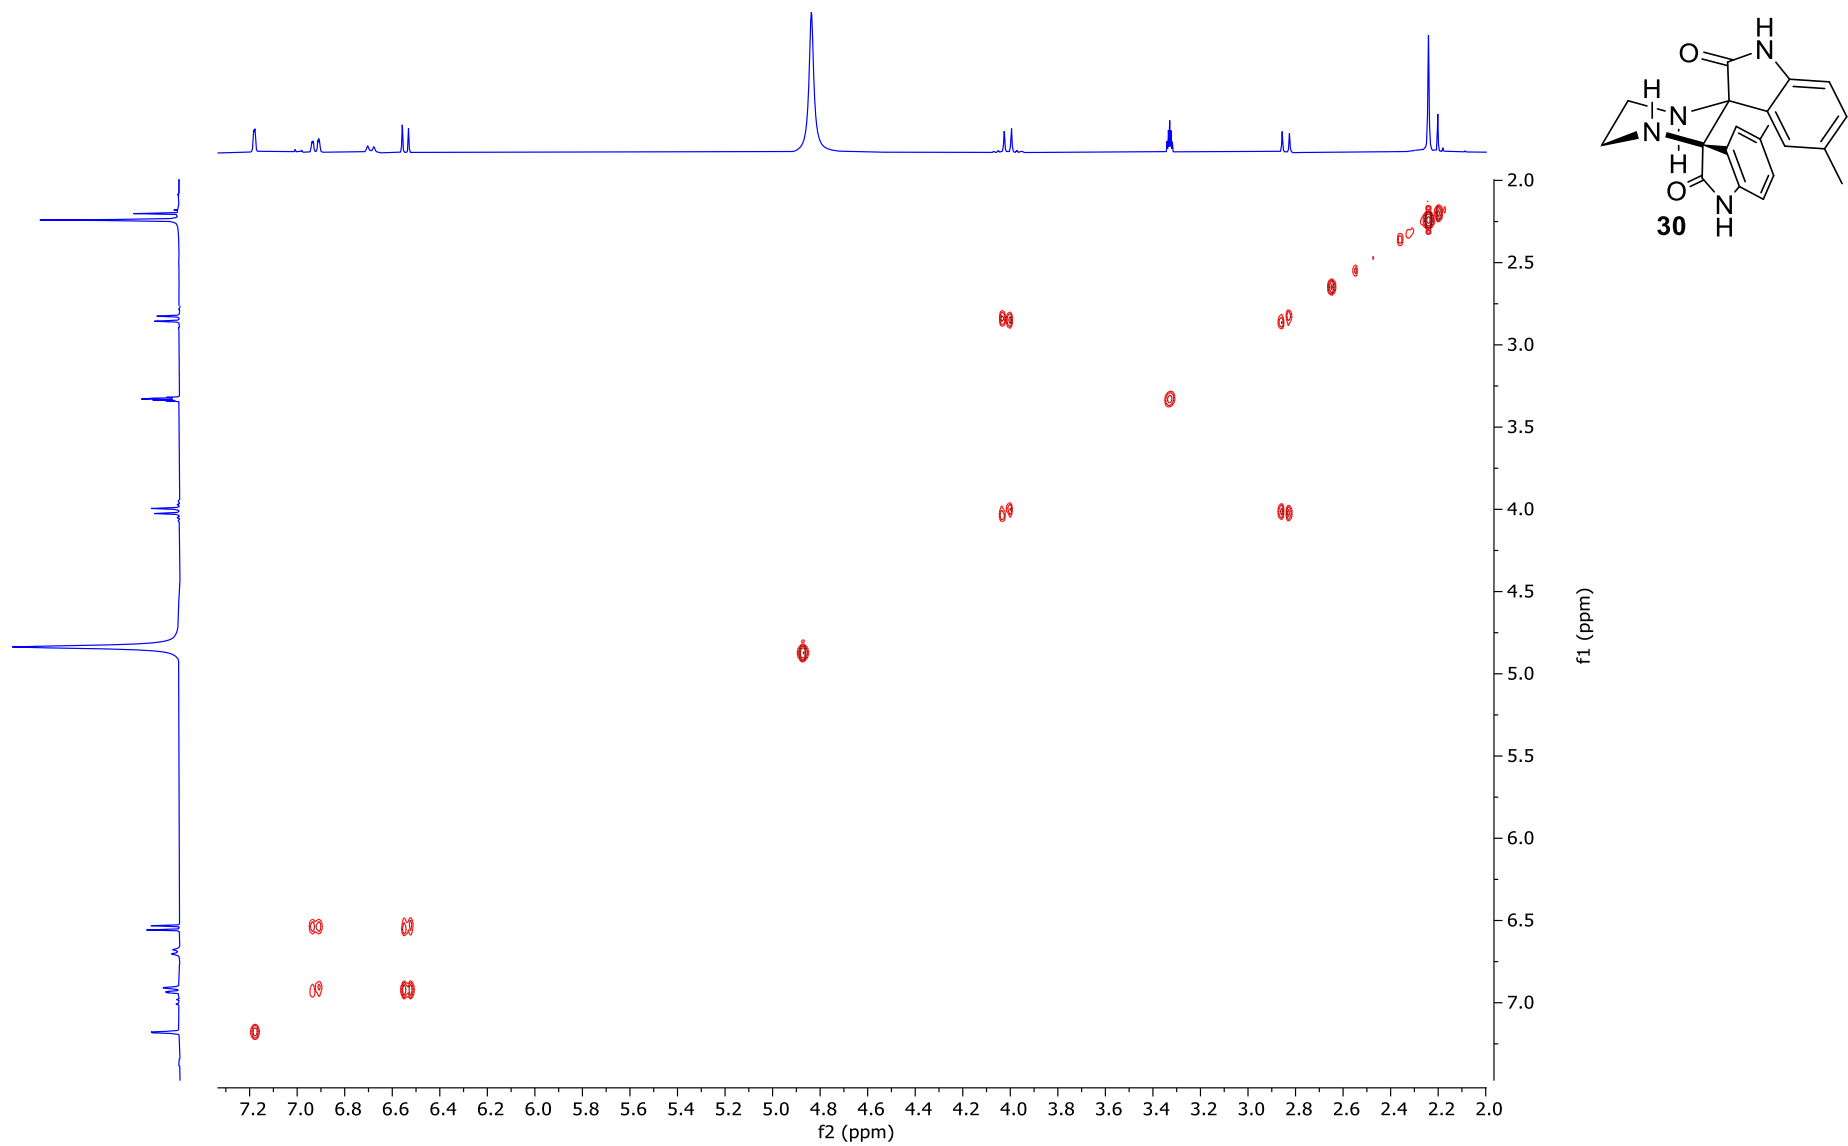

**Figure S13.** 2D NMR (COSY) (300 MHz, CD<sub>3</sub>OD) of **30**.

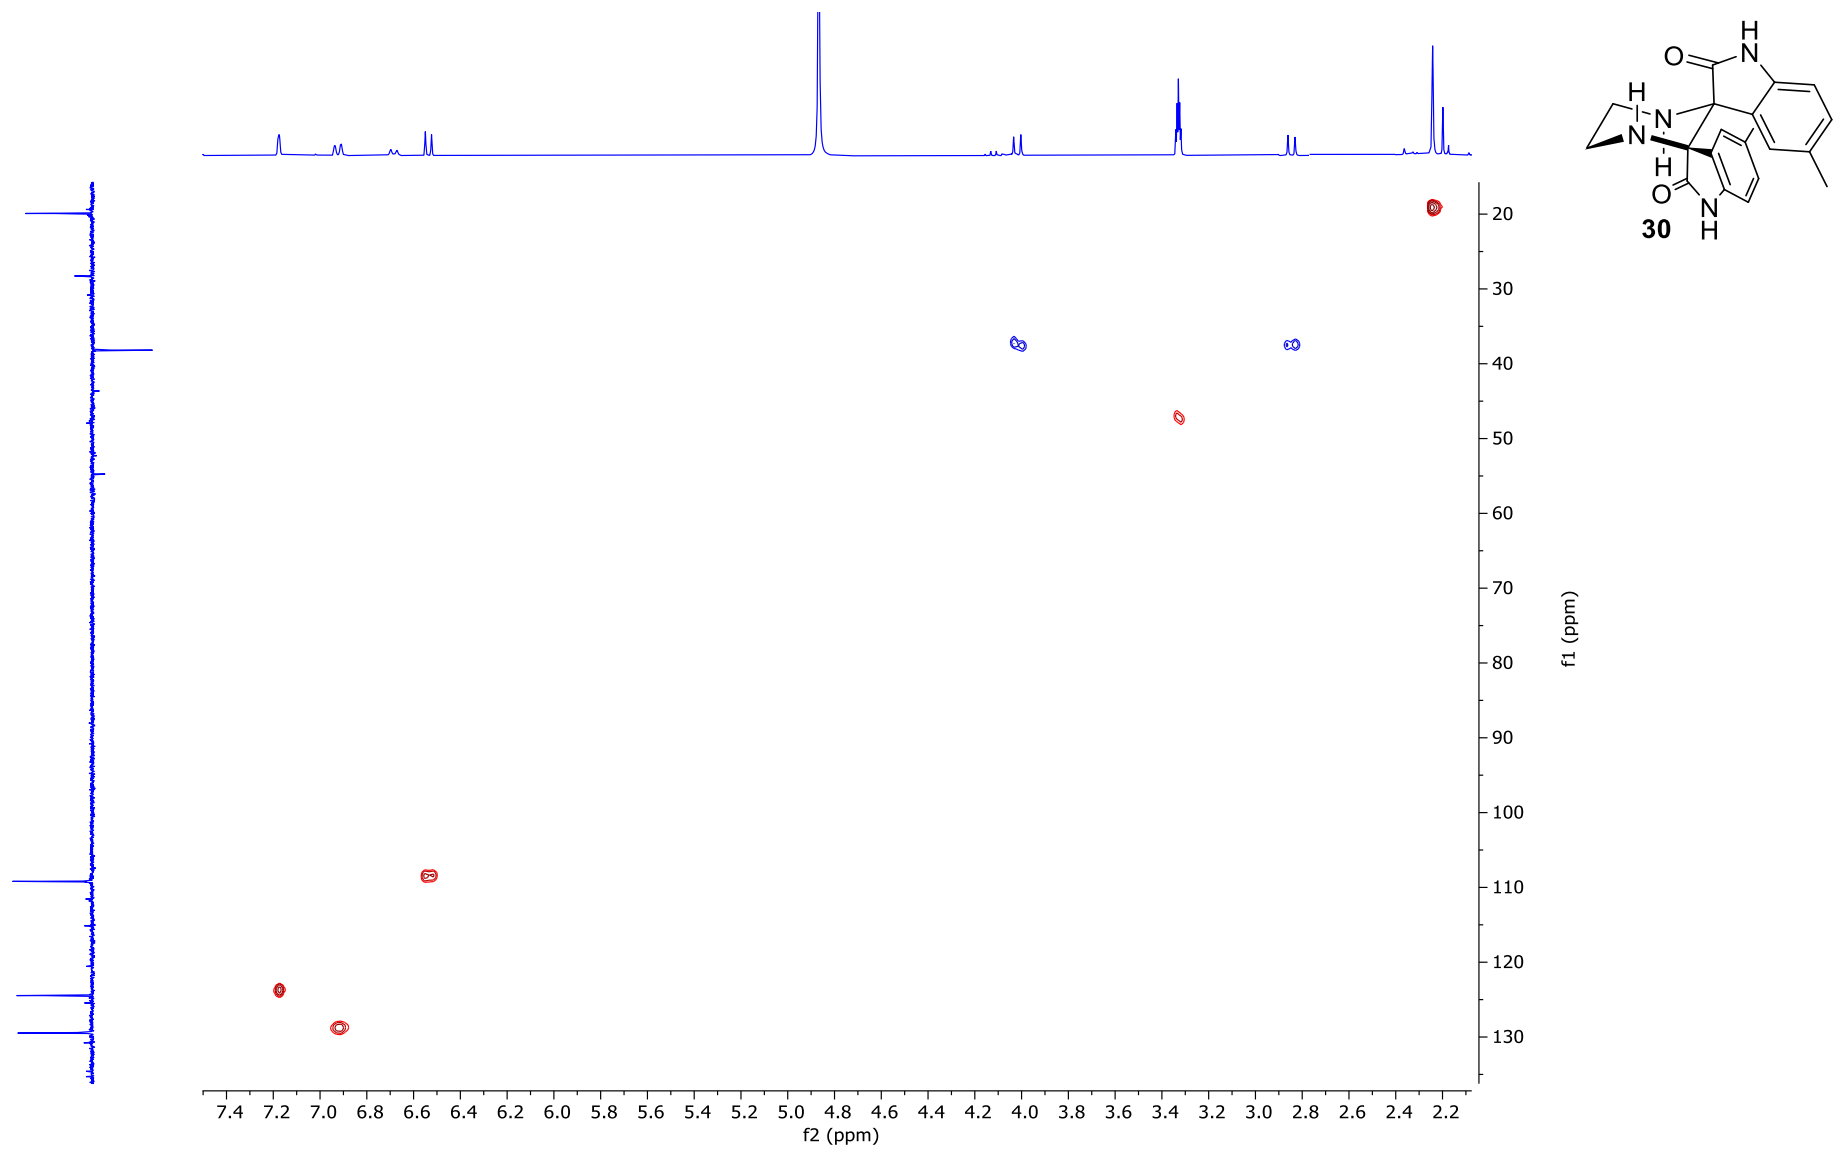

**Figure S14.** 2D NMR (HMQC) (300 MHz, CD<sub>3</sub>OD) of **30**.

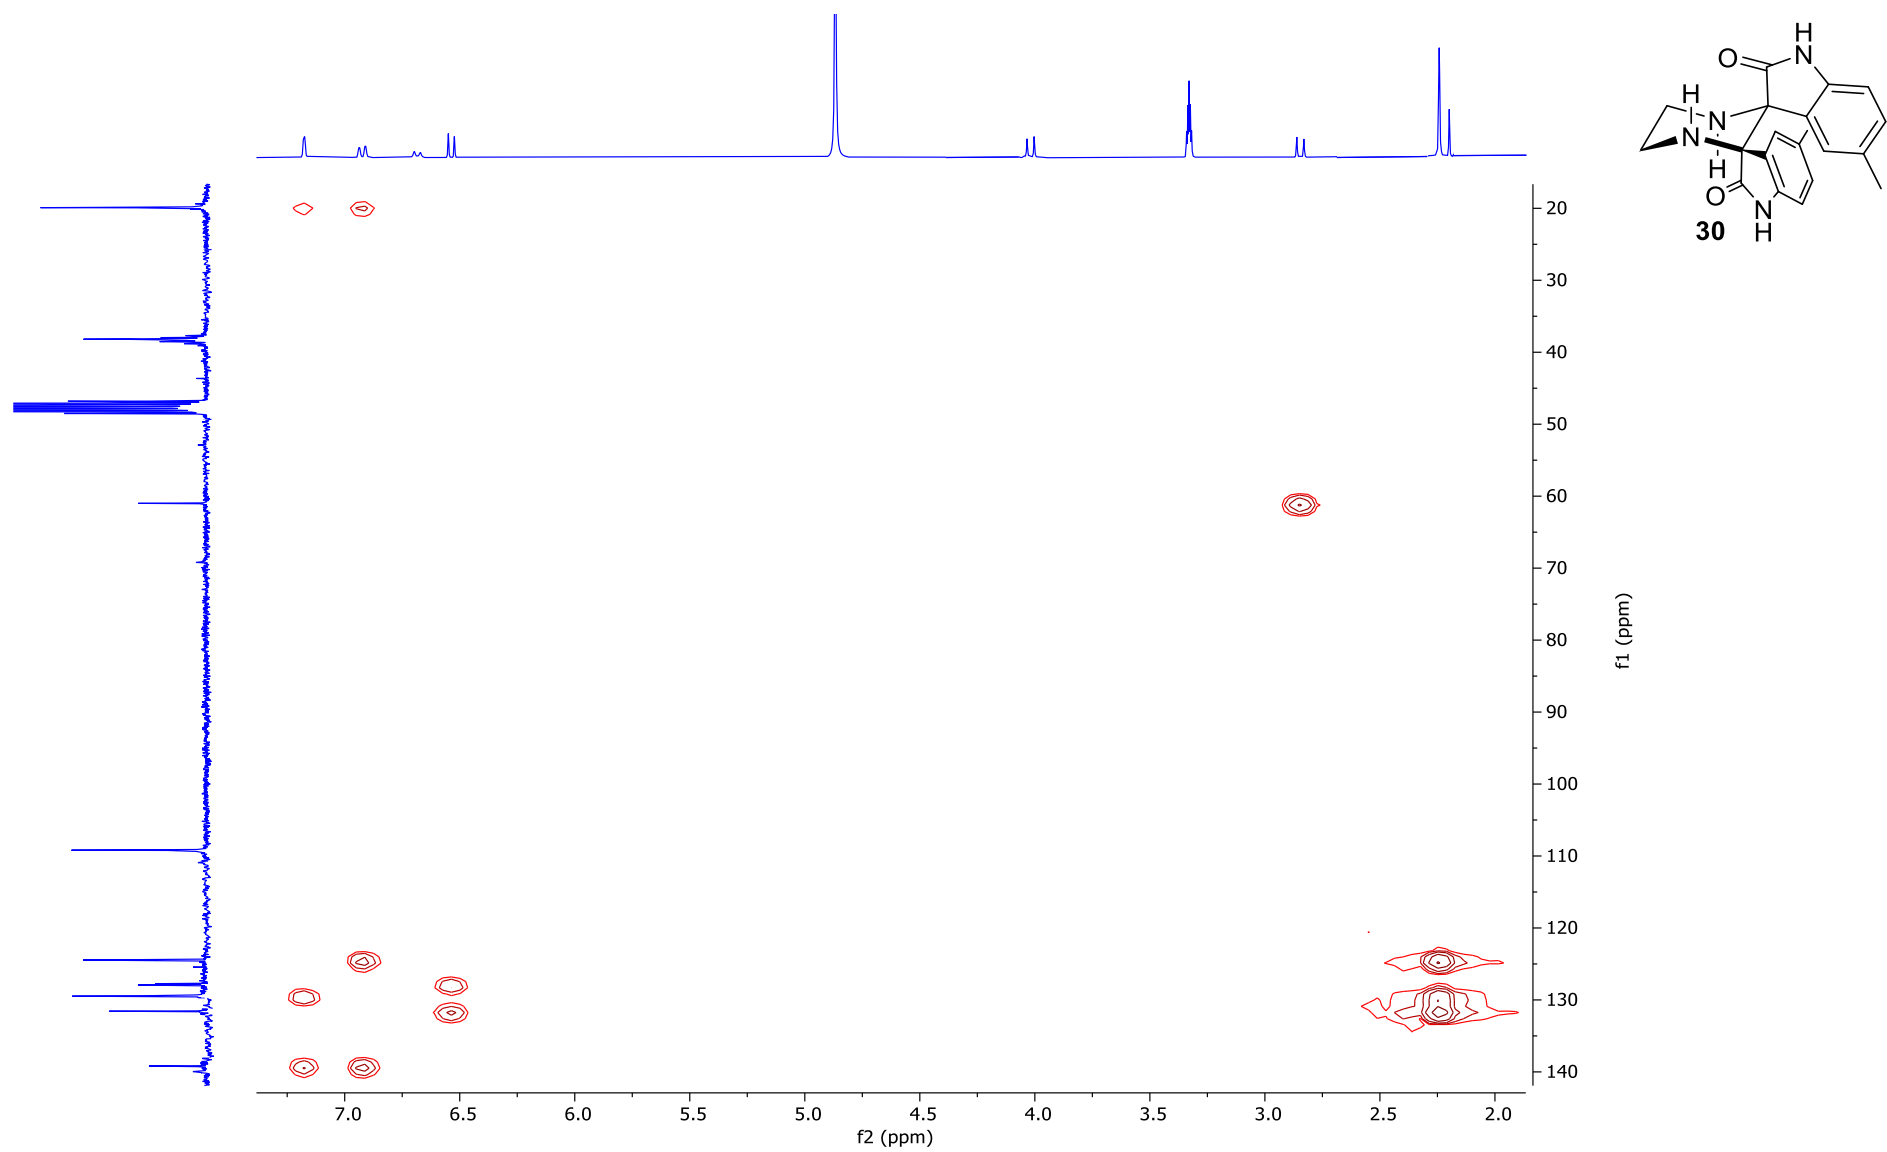

**Figure S15.** 2D NMR (HMBC) (600 MHz, CD<sub>3</sub>OD) of **30**.
